# Supplementary material for: Association of Computed Tomographic Screening Promotion With Lung Cancer Overdiagnosis Among Asian Women
Source: PubMed Central journal article supplement (PMC8767491; doi:10.1001/jamainternmed.2021.7769), 2022-01-18

## Supplementary Online Content

Gao W, Wen CP, Wu A, Welch HG. Association of computed tomographic screening promotion with lung cancer overdiagnosis among Asian women. *JAMA Intern Med*. Published online January 18, 2022. doi:10.1001/jamainternmed.2021.7769

**eMethods 1.** Calculation of Stage Distribution and Stage-Specific Incidence

**eMethods 2.** Estimates of the Number of Women Overdiagnosed

**eFigure 1.** Improved Air Quality in Taiwan, 1990-2017

**eFigure 2.** Joinpoint Trend Analysis of Stage-Specific Female Lung Cancer Incidence, 2004-2018

**eFigure 3.** National Health Insurance (NHI Taiwan) Claims for Thoracotomies in Women, 2000-2018

**eFigure 4.** Female Lung Cancer Stage Distribution by Age, 2004-2018

This supplementary material has been provided by the authors to give readers additional information about their work.

## eMethods 1. Calculation of Stage Distribution and Stage-Specific Incidence

### Counts by stage & calculation of stage distribution

2004-2018 counts are from Taiwan National Cancer Registry Online Interactive Inquiry System

<https://cris.hpa.gov.tw/pagepub/Home.aspx?itemNo=cr.p.20>

| Lung cancer in Taiwanese FEMALES |     |      |     |     |      |      |                   |            |                    |            |
|----------------------------------|-----|------|-----|-----|------|------|-------------------|------------|--------------------|------------|
| Counts by Stage                  |     |      |     |     |      |      | Early/Late Counts |            | Stage Distribution |            |
| Year                             | 0   | 1    | 2   | 3   | 4    | All  | Early (0-1)       | Late (2-4) | Early (0-1)        | Late (2-4) |
| 2004                             | 0   | 224  | 53  | 500 | 1254 | 2031 | 224               | 1807       | 11%                | 89%        |
| 2005                             | 0   | 277  | 47  | 505 | 1359 | 2188 | 277               | 1911       | 13%                | 87%        |
| 2006                             | 0   | 317  | 58  | 539 | 1484 | 2398 | 317               | 2081       | 13%                | 87%        |
| 2007                             | 0   | 406  | 72  | 590 | 1728 | 2796 | 406               | 2390       | 15%                | 85%        |
| 2008                             | 0   | 448  | 88  | 611 | 1764 | 2911 | 448               | 2463       | 15%                | 85%        |
| 2009                             | 0   | 639  | 83  | 630 | 2096 | 3448 | 639               | 2809       | 19%                | 81%        |
| 2010                             | 3   | 663  | 152 | 452 | 2227 | 3497 | 666               | 2831       | 19%                | 81%        |
| 2011                             | 4   | 703  | 140 | 414 | 2275 | 3536 | 707               | 2829       | 20%                | 80%        |
| 2012                             | 10  | 937  | 141 | 452 | 2450 | 3990 | 947               | 3043       | 24%                | 76%        |
| 2013                             | 12  | 1005 | 151 | 414 | 2466 | 4048 | 1017              | 3031       | 25%                | 75%        |
| 2014                             | 18  | 1276 | 179 | 408 | 2699 | 4580 | 1294              | 3286       | 28%                | 72%        |
| 2015                             | 30  | 1557 | 167 | 437 | 2677 | 4868 | 1587              | 3281       | 33%                | 67%        |
| 2016                             | 41  | 1806 | 196 | 439 | 2721 | 5203 | 1847              | 3356       | 35%                | 65%        |
| 2017                             | 369 | 2212 | 195 | 565 | 2758 | 6099 | 2581              | 3518       | 42%                | 58%        |
| 2018                             | 151 | 2544 | 280 | 464 | 2866 | 6305 | 2695              | 3610       | 43%                | 57%        |

### Calculation of stage-specific incidence using stage distribution and overall incidence

Incidences are expressed per 100,000 and are age-adjusted to the 2000 world standard population. Incidence data are from Taiwan National Cancer Registry Online Interactive Inquiry System.

<https://cris.hpa.gov.tw/pagepub/Home.aspx?itemNo=cr.p.20>

| Lung cancer in Taiwanese FEMALES |                    |            |           |                          |            |  |
|----------------------------------|--------------------|------------|-----------|--------------------------|------------|--|
|                                  | Stage Distribution |            | Incidence | Stage-specific Incidence |            |  |
| Year                             | Early (0-1)        | Late (2-4) | (overall) | Early (0-1)              | Late (2-4) |  |
|                                  | [a]                | [b]        | [c]       | [= a x c]                | [= b x c]  |  |
| 2004                             | 11%                | 89%        | 21.03     | 2.32                     | 18.71      |  |
| 2005                             | 13%                | 87%        | 21.68     | 2.74                     | 18.94      |  |
| 2006                             | 13%                | 87%        | 22.37     | 2.96                     | 19.41      |  |
| 2007                             | 15%                | 85%        | 23.55     | 3.42                     | 20.13      |  |
| 2008                             | 15%                | 85%        | 23.26     | 3.58                     | 19.68      |  |
| 2009                             | 19%                | 81%        | 26.03     | 4.82                     | 21.21      |  |
| 2010                             | 19%                | 81%        | 24.97     | 4.76                     | 20.21      |  |
| 2011                             | 20%                | 80%        | 25.48     | 5.09                     | 20.39      |  |
| 2012                             | 24%                | 76%        | 27.41     | 6.51                     | 20.90      |  |
| 2013                             | 25%                | 75%        | 26.87     | 6.75                     | 20.12      |  |
| 2014                             | 28%                | 72%        | 28.72     | 8.11                     | 20.61      |  |
| 2015                             | 33%                | 67%        | 29.12     | 9.49                     | 19.63      |  |
| 2016                             | 35%                | 65%        | 30.70     | 10.9                     | 19.80      |  |
| 2017                             | 42%                | 58%        | 31.56     | 13.36                    | 18.20      |  |
| 2018                             | 43%                | 57%        | 33.69     | 14.40                    | 19.29      |  |

## **eMethods 2. Estimates of the Number of Women Overdiagnosed**

### **Overview**

Because it is impossible to establish overdiagnosis in an individual, there is no perfect method to estimate the number of individuals overdiagnosed. Overdiagnosis is easily appreciated at a population scale, however, and it is important to provide some sense of the number of individuals affected.

On the following pages, we detail two simple approaches used to estimate the number of women overdiagnosed in Taiwan. More complex methods are, of course, possible – but they come at a cost: less transparency (the “black box” problem) and more assumptions. Whether the added complexity results in more accuracy is uncertain. Our experience is that it does not: using two more complex (and more difficult to describe) approaches produced estimates similar to those that follow.

Our simple approaches both make the same 3 assumptions:

1. There is no overdiagnosis in 2004 (and years prior).
2. There is no overdiagnosis in late-stage (Stage 2-4) lung cancer.
3. True lung cancer occurrence is stable – that is, there is no change in the underlying rate of clinically meaningful lung cancer.

Each assumption biases our estimate downwards as follows:

1. There is undoubtedly some overdiagnosis in 2004 and prior years.
2. There may be some overdiagnosis in Stage 2 lung cancer (most likely in elderly women).
3. True lung cancer occurrence is likely to be declining. While there is no change in the prevalence of smoking among females (< 5% smoking over past 40 years), it has declined sharply among males (from over 60% to less than 25%). Thus female exposure to second hand smoke has been declining – which would be expected to decrease the true occurrence of lung cancer. Furthermore, there has also been a general improvement in ambient air quality in Taiwan over the last few decades (see **eFigure 1**).

### Excess early-stage incidence approach

One simple approach appears in the table below. To estimate the number of women overdiagnosed, we multiplied the absolute increase in early-stage incidence in a given year over that in observed 2004 (2.32 per 100,000) by the number of women in the population in that year. We then sum across years.

| Year | Female Population | Early -stage incidence | Incidence excess           | Count Overdiagnosed |
|------|-------------------|------------------------|----------------------------|---------------------|
|      | [a]               | [b]                    | [c= b - 2.32]              | [= a * c]           |
| 2004 | 11,147,537        | 2.32                   | 0.00                       | 0                   |
| 2005 | 11,207,943        | 2.74                   | 0.43                       | 48                  |
| 2006 | 11,284,820        | 2.96                   | 0.64                       | 72                  |
| 2007 | 11,349,593        | 3.42                   | 1.10                       | 125                 |
| 2008 | 11,410,680        | 3.58                   | 1.26                       | 144                 |
| 2009 | 11,483,038        | 4.82                   | 2.50                       | 288                 |
| 2010 | 11,526,898        | 4.76                   | 2.44                       | 281                 |
| 2011 | 11,579,238        | 5.09                   | 2.78                       | 321                 |
| 2012 | 11,642,503        | 6.51                   | 4.19                       | 487                 |
| 2013 | 11,688,843        | 6.75                   | 4.43                       | 518                 |
| 2014 | 11,735,782        | 8.11                   | 5.79                       | 680                 |
| 2015 | 11,780,027        | 9.49                   | 7.17                       | 845                 |
| 2016 | 11,820,546        | 10.90                  | 8.58                       | 1014                |
| 2017 | 11,851,647        | 13.36                  | 11.04                      | 1308                |
| 2018 | 11,876,019        | 14.40                  | 12.08                      | 1434                |
|      |                   |                        |                            |                     |
|      |                   |                        | <b>Total Overdiagnosed</b> | <b>7565</b>         |

The weakness of this approach is that early-stage incidence is age-adjusted. Taiwan is rapidly aging – from 2004 to 2017 the proportion of females age 60 or older has increased from 13% to 22%.

In an aging society, even a stable age-adjusted incidence will imply more cancer patients. Similarly, even a stable rate of cancer overdiagnosis will imply more overdiagnosed patients. Thus this approach is clearly an undercount, as is evident in the counts of cases on the following page.

### Excess early-stage count approach

The table below shows the raw counts of Taiwanese women diagnosed with early-stage (Stage 0 or 1) lung cancer. Again, we assume no overdiagnosis in 2004. But because there is no decline in the incidence of late-stage lung cancer, all of the counts in excess of 2004 are taken to represent overdiagnosis.

| Year                       | Early Stage Count | Excess Count |
|----------------------------|-------------------|--------------|
|                            | [a]               | [= a - 224]  |
| 2004                       | 224               | 0            |
| 2005                       | 277               | 53           |
| 2006                       | 317               | 93           |
| 2007                       | 406               | 182          |
| 2008                       | 448               | 224          |
| 2009                       | 639               | 415          |
| 2010                       | 666               | 442          |
| 2011                       | 707               | 483          |
| 2012                       | 947               | 723          |
| 2013                       | 1017              | 793          |
| 2014                       | 1294              | 1070         |
| 2015                       | 1587              | 1363         |
| 2016                       | 1847              | 1623         |
| 2017                       | 2581              | 2357         |
| 2018                       | 2695              | 2471         |
|                            |                   |              |
| <b>Total Overdiagnosed</b> |                   | <b>12292</b> |

Given the two forgoing approaches our estimate is expressed as a range: between 7 to 12 thousand Taiwanese women have been overdiagnosed.

**eFigure 1. Improved Air Quality in Taiwan, 1990-2017<sup>1</sup>**

The proportion of the Taiwanese population using solid fuel (wood, coal) dropped substantially from 36% to 5% between 1990 and 2017. Over the same period the estimated rate of death attributable to air pollution declined 40%.

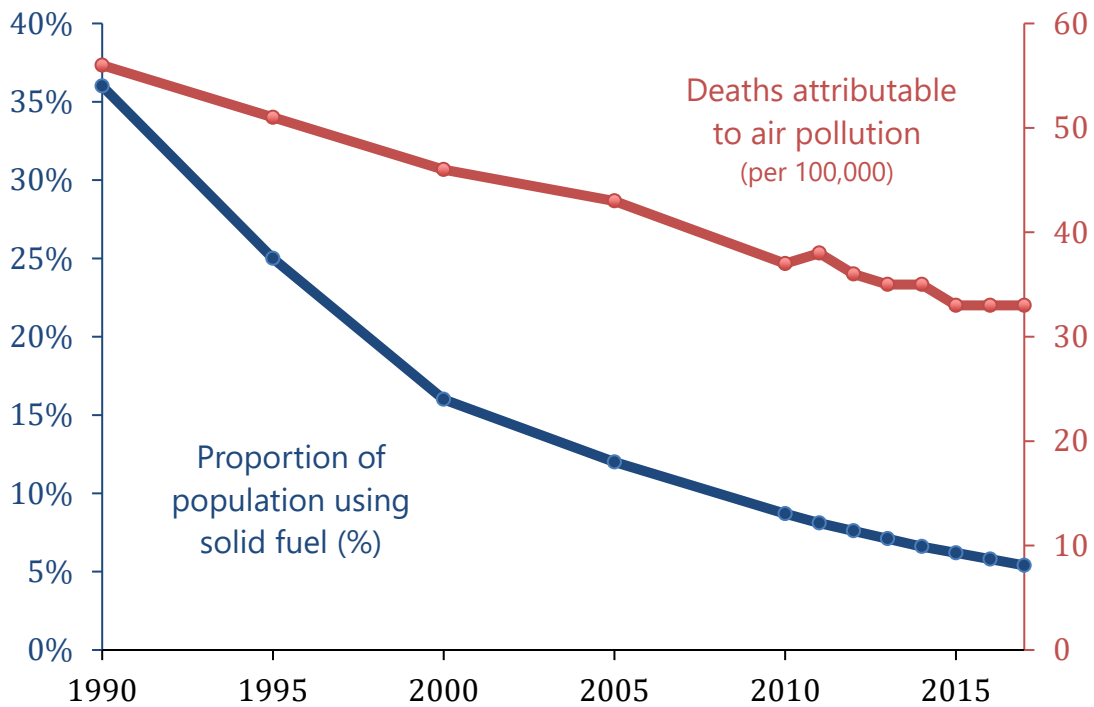

<sup>1</sup> Health Effects Institute. 2019. State of Global Air 2019.

<https://www.stateofglobalair.org/data/#/air/plot?pollutants=pm25>

<https://www.stateofglobalair.org/data/#/health/plot?pollutants=airpoll>

**eFigure 2. Joinpoint Trend Analysis of Stage-Specific Female Lung Cancer Incidence, 2004-2018**

While late-stage incidence did not significantly change over the entire period 2004-2018, a Joinpoint trend analysis detects a joinpoint (i.e. an inflection in slope) in 2009 – suggesting an increase in late-stage disease between 2004 and 2009 (APC=2.4; 95%CI: 0.5, 4.4), followed by a decrease between 2009 and 2018 (APC=-1.0; 95%CI: -1.8, -0.2).

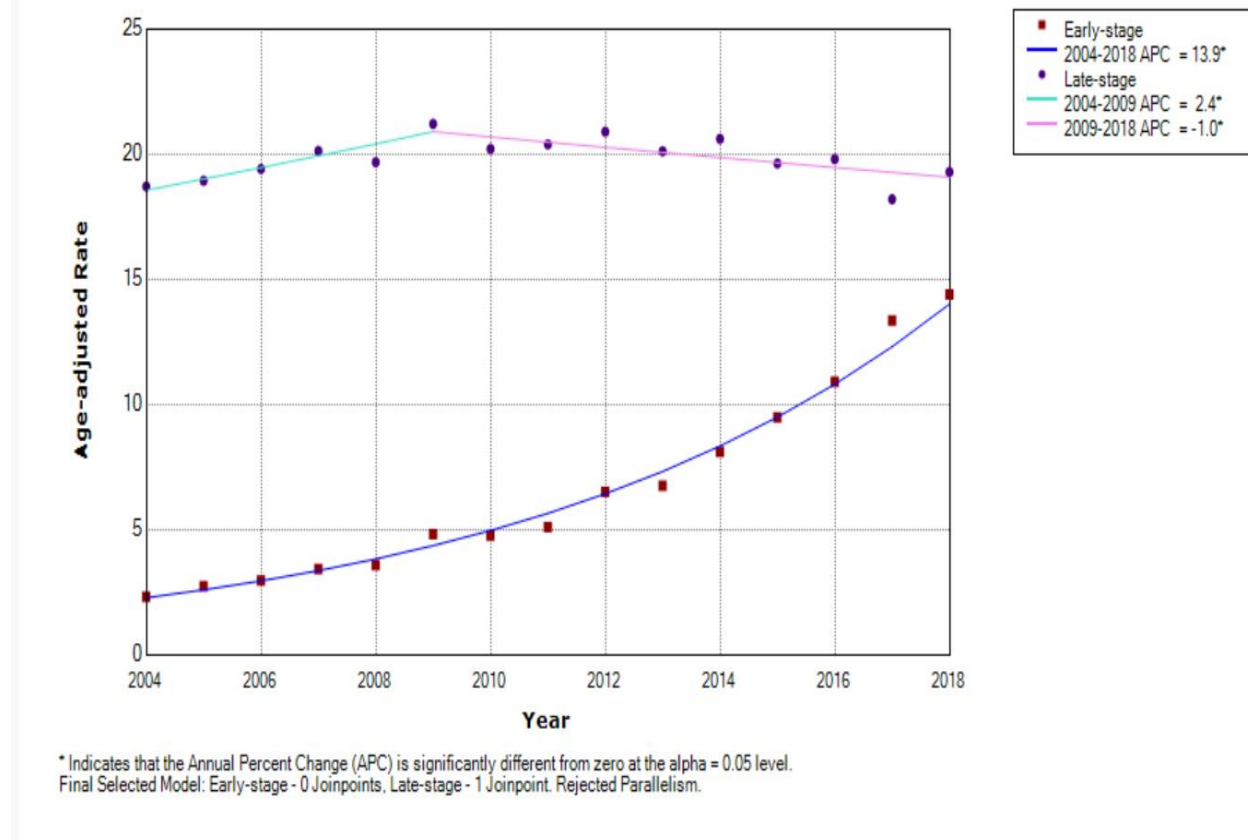

Confidence Intervals: Parametric method  
Joinpoint Version 4.9.0.0. Model Selection Method: Permutation Test.

| Estimated Joinpoints        |           |                |                |          |          |          |                    |          |
|-----------------------------|-----------|----------------|----------------|----------|----------|----------|--------------------|----------|
| Cohort                      | Joinpoint | Estimate       | Lower CI       | Upper CI |          |          |                    |          |
| Late Stage                  | 1         | 2009           | 2007           | 2015     |          |          |                    |          |
| Annual Percent Change (APC) |           |                |                |          |          |          |                    |          |
| Cohort                      | Segment   | Lower Endpoint | Upper Endpoint | APC      | Lower CI | Upper CI | Test Statistic (t) | Prob > t |
| Early-Stage                 | 1         | 2004           | 2018           | 13.9*    | 13.0     | 14.7     | 36.5               | <0.001   |
| Late-Stage                  | 1         | 2004           | 2009           | 2.4*     | 0.5      | 4.4      | 2.8                | 0.020    |
| Late-Stage                  | 2         | 2009           | 2018           | -1.0*    | -1.8     | -0.2     | -2.9               | 0.016    |

\*Indicates that the Annual Percent Change (APC) is significantly different from zero at the alpha = 0.05 level.

Joinpoint Regression Program, version 4.9.0.0. <https://surveillance.cancer.gov/joinpoint>  
Statistical Methodology and Applications Branch, S. R. P., National Cancer Institute (2021).



**eFigure 3. National Health Insurance (NHI Taiwan) Claims for Thoracotomies in Women, 2000-2018**

Thoracotomies include lobectomies, segmental and wedge resections of the lung.

VATS claim were introduced in 2007, all claims prior to 2007 were for conventional thoracotomies.

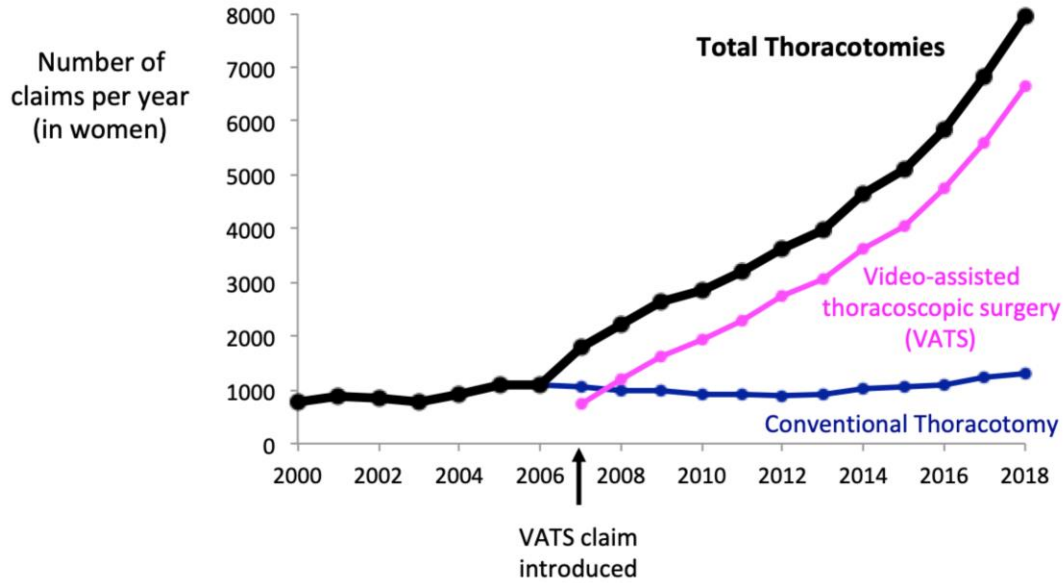

### eFigure 4. Female Lung Cancer Stage Distribution by Age, 2004-2018

While late-stage incidence has been stable (see Figure 4, main paper), the additional early-stage tumors have changed the stage-distribution: the proportion of cancers presenting as late-stage has fallen. The effect is most pronounced in women under age 50, suggesting screening is disproportionately occurring in this group.

Lung Cancer stage data are from Taiwan National Cancer Registry Online Interactive Inquiry System.  
<https://cris.hpa.gov.tw/pagepub/Home.aspx?itemNo=cr.p.20>

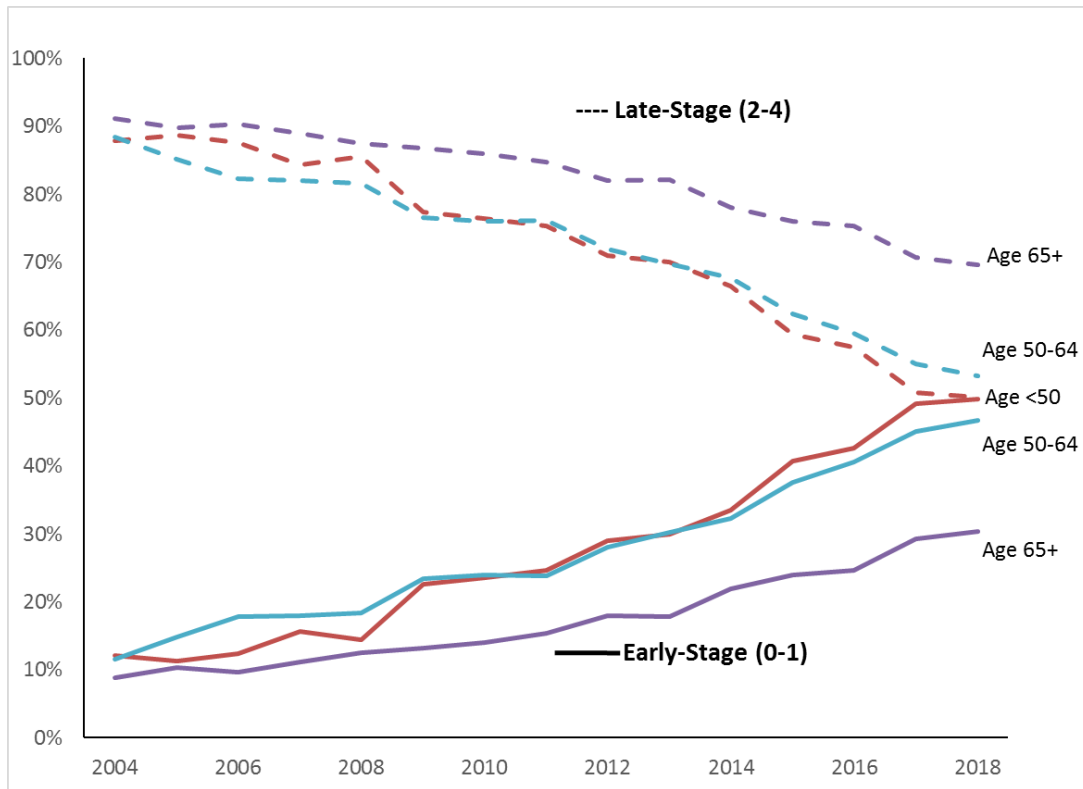

Supplement: jamainternmed-e217769-s001.pdf [file jamainternmed-e217769-s001.pdf]
